# Supplementary material for: Comparison of Functional Outcomes between Supervised Rehabilitation and Telerehabilitation in Female Patients with Patellofemoral Pain Syndrome during the COVID-19 Pandemic
Source: MDPI journal article supplement (doi:10.3390/ijerph20032233), 2023-01-26
Supplement: s1 [file s1]

Supplementary Materials File S1: Exercise program

1. Stretching program

| Exercise                                                                            | Implementation                                                                                                                                                                                                                                      | Duration   |
|-------------------------------------------------------------------------------------|-----------------------------------------------------------------------------------------------------------------------------------------------------------------------------------------------------------------------------------------------------|------------|
|    | <p>-In the prone position, hip extension with maximally flexed knee joint.<br/>(15 repetitions, 3 sets)</p>                                                                                                                                         |            |
| <p>- Dynamic stretching of the quadriceps</p>                                       |                                                                                                                                                                                                                                                     |            |
|    | <p>-Repeatedly performing the movement of 90° hip joint flexion in the supine position and 90° knee joint flexion position, extending the knee to the end of the joint range of motion and holding it for 1 second<br/>(15 repetitions, 3 sets)</p> |            |
| <p>-Dynamic stretching of the hamstring</p>                                         |                                                                                                                                                                                                                                                     | 15 minutes |
|  | <p>-In a standing position, the involved leg is straightened, and then dropping the heel down toward the floor.<br/>(15 repetitions, 3 sets)</p>                                                                                                    |            |
| <p>-Dynamic stretching of the gastrocnemius</p>                                     |                                                                                                                                                                                                                                                     |            |

## 2. Open and closed kinetic chain exercises

| Exercise                                                                            | Progress                                                                                                                                                                                                                                                | Duration   |
|-------------------------------------------------------------------------------------|---------------------------------------------------------------------------------------------------------------------------------------------------------------------------------------------------------------------------------------------------------|------------|
| <b>Open kinetic chain exercises</b>                                                 |                                                                                                                                                                                                                                                         |            |
|    | <ul style="list-style-type: none"><li>- Weeks 1-2: 10 reps, 2 sets, hold for 5 seconds</li><li>- Weeks 3-4: 12 reps, 3 sets, hold for 10 seconds (resistance: green)</li></ul>                                                                          |            |
| - Straight leg raising                                                              |                                                                                                                                                                                                                                                         |            |
|   | <ul style="list-style-type: none"><li>- Weeks 1-2: 10 reps, 2 sets, hold for 5 seconds</li><li>- Weeks 3-4: 12 reps, 3 sets, hold for 10 seconds</li><li>- Weeks 5-6: additional resistance band applied to the weeks 3-4 (resistance: green)</li></ul> |            |
| - Knee extension                                                                    |                                                                                                                                                                                                                                                         |            |
| <b>Closed kinetic chain exercises</b>                                               |                                                                                                                                                                                                                                                         |            |
|  | <ul style="list-style-type: none"><li>- Weeks 1-2: 10 reps, 2 sets, hold for 5 seconds</li><li>- Weeks 3-4: 12 reps, 3 sets, hold for 10 seconds</li><li>- Weeks 5-6: additional resistance band applied to the weeks 3-4 (resistance: green)</li></ul> |            |
| - Double leg squat                                                                  |                                                                                                                                                                                                                                                         |            |
|                                                                                     |                                                                                                                                                                                                                                                         | 35 minutes |

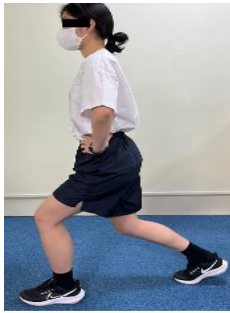

- Forward lunge

- Weeks 1-2: 12 reps, 3 sets
- Weeks 3-4: 12 reps, 3 sets
- Weeks 5-6: additional resistance band applied to the weeks 3-4 (resistance: green)

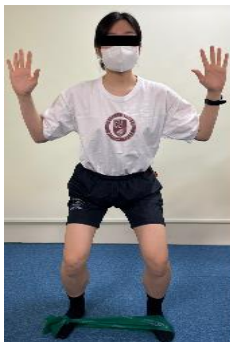

- Sideways walking

- Weeks 1-2: 20 reps, 2 sets, hold for 5 seconds (resistance: green)
- Weeks 3-4: 12 reps, 3 sets, hold for 10 seconds (resistance: green)
- Weeks 5-6: Progression in Theraband resistance (resistance: blue)

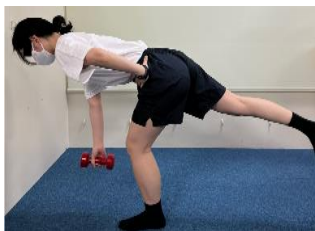

- Single leg Romanian deadlift

- Weeks 1-2: 12 reps, 3 sets
- Weeks 3-4: 12 reps, 3 sets
- Weeks 5-6: additional resistance band applied to the weeks 3-4 (resistance: green)

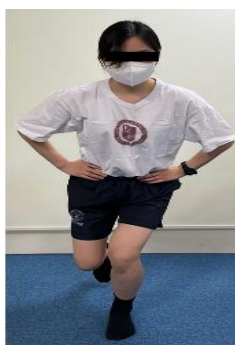

- Single leg standing balance

---

- Weeks 1-2: 20seconds, 3 sets, with eye opened
- Weeks 3-4: 30seconds, 3 sets, with eye opened
- Weeks 5-6: additional resistance band applied to the weeks 3-4 (resistance: green)
